# Supplementary material for: Body mass index at 11 years and bone mass at age 18: path analysis within the 1993 Pelotas (Brazil) birth cohort study
Source: Springer Nature journal article supplement (doi:10.1186/s12891-015-0529-y), 2015-03-29
Supplement: MOESM6 [file 9752272]

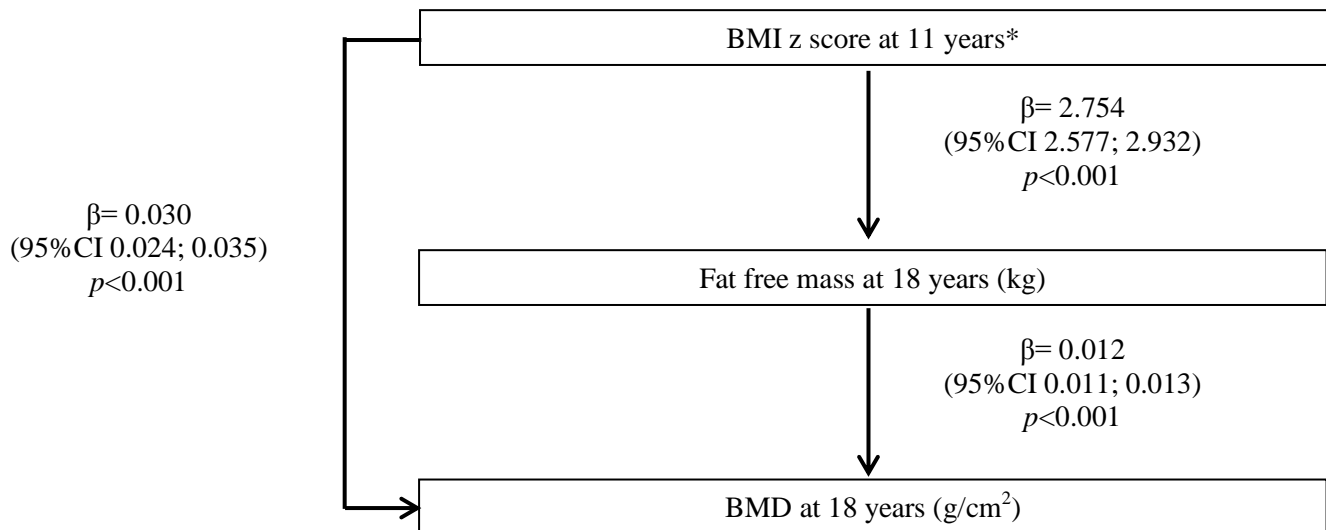

**Figure 6** Overall association between BMI z score at 11 years, fat free mass and bone mineral density at age 18 among males (N=1601). The 1993 Pelotas Birth Cohort. Brazil.

$\beta$  - linear regression coefficient; 95%CI - 95% confidence interval;  $p$ -value from Wald's test; BMI - body mass index; BMD - bone mineral density; \*According to the World Health Organization for children and teenagers from 5 to 19 years
